# Supplementary material
Source: publisher figshare collection journal article supplement (https://frontiersin.figshare.com/ndownloader/files/27920811)
Supplement: Supplementary file 1 [file 27920811]

(listing pending)
